# Supplementary material for: Germline pathogenic variants in transcription factors predisposing to pediatric acute myeloid leukemia: results from the French ELAM02 trial
Source: PubMed Central journal article supplement — Haematologica. 2020 Jun 18;106(3):908–12. doi: 10.3324/haematol.2020.248872 (PMC7928013; doi:10.3324/haematol.2020.248872), 2020-06-18
Supplement: 2020_248872-Disclosures_Contributions.pdf [file 2020_248872-Disclosures_Contributions.pdf]

Haematologica  
HAEMATOL/2020/248872  
Version 4

Germline pathogenic variants in transcription factors predisposing to pediatric acute myeloid leukemia: results from the French ELAM02 trial

Laurène Fenwarth, Nicolas Duployez, Alice Marceau-Renaut, Wadih Abou Chahla, Stéphane Ducassou, Virginie Gandemer, Marlène Pasquet, Thierry Leblanc, Pascale Schneider, Carine Domenech, Paul Saultier, Guy Leverger, Hélène Lapillonne, Claude Preudhomme, and Arnaud Petit

Disclosures: The authors declare no conflict of interest.

Contributions: GL was the principal investigator of the ELAM02 trial. AP, GL, TL, VG, WAC, SD, MP, PS, CD, PS, CHD, enrolled patients in the study. HL and AP created the patient database. HL centralized all the AML samples in the ELAM02 national tumor bank. LF, AMR, ND performed genomic analysis. LF performed the research and wrote the manuscript. CP revised the manuscript which was approved by all authors.
