# Supplementary material for: Germline pathogenic variants in transcription factors predisposing to pediatric acute myeloid leukemia: results from the French ELAM02 trial
Source: PubMed Central journal article supplement — Haematologica. 2020 Jun 18;106(3):908–12. doi: 10.3324/haematol.2020.248872 (PMC7928013; doi:10.3324/haematol.2020.248872), 2020-06-18
Supplement: 2020_248872_FENWARTH_SUPPL.pdf [file 2020_248872_FENWARTH_SUPPL.pdf]

**Germline pathogenic variants in transcription factors predisposing to pediatric acute myeloid leukemia: results from the French ELAM02 trial**

Laurène Fenwarth,<sup>1</sup> Nicolas Duployez,<sup>1</sup> Alice Marceau-Renaut,<sup>1</sup> Wadih Abou Chahla,<sup>2</sup> Stéphane Ducassou,<sup>3</sup> Virginie Gandemer,<sup>4</sup> Marlène Pasquet,<sup>5</sup> Thierry Leblanc,<sup>6</sup> Pascale Schneider,<sup>7</sup> Carine Domenech,<sup>8</sup> Paul Saultier,<sup>9</sup> Guy Leverger,<sup>10</sup> Hélène Lapillonne,<sup>11</sup> Claude Preudhomme<sup>1</sup> and Arnaud Petit<sup>10</sup>

<sup>1</sup>Laboratory of Hematology, CHU Lille, INSERM UMR-S 1277 - 9020 CNRS, Lille; <sup>2</sup>Pediatric Hematology Department, CHU Lille, Lille; <sup>3</sup>Pediatric Hematology and Oncology Department, CHU Bordeaux, Bordeaux; <sup>4</sup>Pediatric Hematology and Oncology Department, CHU Rennes, Rennes; <sup>5</sup>Pediatric Hematology and Immunology Department, CHU Toulouse, Toulouse; <sup>6</sup>Pediatric Hematology Department, AP-HP Robert Debré Hospital, Paris; <sup>7</sup>Pediatric Hematology Department, CHU Rouen, Rouen; <sup>8</sup>Institute of Hematology and Pediatric Oncology, Lyon 1 University, Hospices Civils de Lyon, Lyon; <sup>9</sup>Department of Pediatric Hematology and Oncology, Timone Enfants Hospital, APHM and Aix-Marseille University, Marseille; <sup>10</sup>Pediatric Hematology and Oncology Department, Armand Trousseau Hospital, AP-HP, Sorbonne University, UMRS\_938, CONECT-AML, Paris and <sup>11</sup>Laboratory of Hematology, Armand Trousseau Hospital, Sorbonne University, UMRS\_938, CONECT-AML, Paris, France.

Correspondence: LAURENE FENWARTH - [laurene.fenwarth@chru-lille.fr](mailto:laurene.fenwarth@chru-lille.fr)

doi:10.3324/haematol.2020.248872

## Supplementary Materials

Fenwarth et al.

**Supplementary Table 1: Targeted sequencing panel used to screen molecular profile of the ELAM02 cohort<sup>1</sup>**

| Gene          | RefSeq         | Coverage         |
|---------------|----------------|------------------|
| <i>ASXL1</i>  | NM_015338.5    | Exons 11–12      |
| <i>BCOR</i>   | NM_001123385.1 | Exons 2–15       |
| <i>BCORL1</i> | NM_021946.4    | Exons 1–12       |
| <i>CBL</i>    | NM_005188.3    | Exons 8–9        |
| <i>CEBPA</i>  | NM_004364.3    | Exon 1           |
| <i>DNMT3A</i> | NM_022552.4    | Exons 2–23       |
| <i>ETV6</i>   | NM_001987.4    | Exons 1–8        |
| <i>EZH2</i>   | NM_004456.4    | Exons 2–20       |
| <i>FLT3</i>   | NM_004119.2    | Exon 20          |
| <i>GATA1</i>  | NM_002049.3    | Exon 2           |
| <i>GATA2</i>  | NM_032638.4    | Exons 2–6        |
| <i>IDH1</i>   | NM_005896.3    | Exon 4           |
| <i>IDH2</i>   | NM_002168.3    | Exon 4           |
| <i>JAK2</i>   | NM_004972.3    | Exons 12, 14, 16 |
| <i>KIT</i>    | NM_000222.2    | Exons 8–13, 17   |
| <i>KRAS</i>   | NM_033360.2    | Exons 2–3        |
| <i>MPL</i>    | NM_005373.2    | Exon 10          |
| <i>NIPBL</i>  | NM_133433.3    | Exons 2–47       |
| <i>NPM1</i>   | NM_002520.6    | Exon 11          |
| <i>NRAS</i>   | NM_002524.3    | Exons 2–3        |
| <i>PHF6</i>   | NM_001015877.1 | Exons 2–10       |
| <i>PTEN</i>   | NM_000314.4    | Exons 5–7        |
| <i>PTPN11</i> | NM_002834.3    | Exons 3, 13      |
| <i>RAD21</i>  | NM_006265.2    | Exons 2–14       |
| <i>RUNX1</i>  | NM_001754.4    | Exons 1–9        |
| <i>SETBP1</i> | NM_015559.2    | Exon 4           |
| <i>SF3B1</i>  | NM_012433.3    | Exons 13–18      |
| <i>SMC1A</i>  | NM_006306.3    | Exons 1–25       |
| <i>SMC3</i>   | NM_005445.3    | Exons 1–29       |
| <i>SRSF2</i>  | NM_003016.4    | Exon 1           |
| <i>STAG2</i>  | NM_001042749.2 | Exons 3–35       |

|              |                |            |
|--------------|----------------|------------|
| <i>TET2</i>  | NM_001127208.2 | Exons 3–11 |
| <i>TP53</i>  | NM_001126112.2 | Exons 2–11 |
| <i>U2AF1</i> | NM_006758.2    | Exons 2, 6 |
| <i>WT1</i>   | NM_024426.3    | Exons 7, 9 |
| <i>ZRSR2</i> | NM_005089.3    | Exons 1–11 |

**Supplementary Table 2: Mutations at diagnosis in the patient cohort**

| Patient ID | Mutation at diagnostic                                                                                                                                                                                                    |
|------------|---------------------------------------------------------------------------------------------------------------------------------------------------------------------------------------------------------------------------|
| Patient 1  | <i>CEBPA</i> NM_004364.3: c.65_125del (p.Pro22Leufs*118) <sup>‡</sup> , c.934_936dup (p.Gln312dup) <sup>‡</sup>                                                                                                           |
| Patient 2  | <i>GATA2</i> NM_032638.4: c.1114G>A (p.Ala372Thr) (VAF 50%)                                                                                                                                                               |
| Patient 3  | <i>GATA2</i> NM_032638.4: c.1008del (p.Lys336Asnfs*51) (VAF 41%)                                                                                                                                                          |
| Patient 4  | <i>RUNX1</i> NM_001754.4: c.601C>T (p.Arg201*) (VAF 55%)                                                                                                                                                                  |
| Patient 5  | <i>RUNX1</i> NM_001754.4: deletion (1.8Mb, CN:1.0, mean log2 ratio: -0.54)                                                                                                                                                |
| Patient 6  | <i>CEBPA</i> NM_004364.3: c.68dup (p.His24Alafs*84) <sup>‡</sup> , c.937_939dup (p.Lys313dup) <sup>‡</sup>                                                                                                                |
| Patient 7  | <i>CEBPA</i> NM_004364.3: c.69del (p.His24Thrfs*136) <sup>‡</sup> , c.930_931insAAG (p.Thr310_Gln311insLys) <sup>‡</sup>                                                                                                  |
| Patient 8  | <i>CEBPA</i> NM_004364.3: c.905_928dup (p.Lys302_Glu309dup) (homozygous mutation) <sup>‡</sup>                                                                                                                            |
| Patient 9  | <i>CEBPA</i> NM_004364.3: c.317_318del (p.Phe106*) <sup>‡</sup> , c.916_945dup (p.Arg306_Leu315dup) <sup>‡</sup>                                                                                                          |
| Patient 10 | <i>CEBPA</i> NM_004364.3: c.112_118del (p.Gly38Argfs*120) <sup>‡</sup> , c.937_939dup (p.Lys313dup) <sup>‡</sup>                                                                                                          |
| Patient 11 | <i>CEBPA</i> NM_004364.3: c.146del (p.Pro49Argfs*111) <sup>‡</sup> , c.911_928dup (p.Lys304_Glu309dup) <sup>‡</sup> // <i>GATA2</i> NM_032638.4: c.989G>T (p.Arg330Leu) (VAF 43%)                                         |
| Patient 12 | <i>CEBPA</i> NM_004364.3: c.162_163insTT (p.Ile55Leufs*106) <sup>‡</sup> , c.935_937dup (p.Lys313dup) <sup>‡</sup>                                                                                                        |
| Patient 13 | <i>CEBPA</i> NM_004364.3: c.196_197insT (p.Ala66Valfs*42) <sup>‡</sup> , c.926_928dupAGA (p.Glu309_Thr310insLys) <sup>‡</sup>                                                                                             |
| Patient 14 | <i>CEBPA</i> NM_004364.3: c.196_197insTA (p.Ala66Valfs*95) <sup>‡</sup> , c.937_939dup (p.Lys313dup) <sup>‡</sup>                                                                                                         |
| Patient 15 | <i>CEBPA</i> NM_004364.3: c.247del (p.Gln83Serfs*77) <sup>‡</sup> , c.937_939dup (p.Lys313dup) <sup>‡</sup>                                                                                                               |
| Patient 16 | <i>CEBPA</i> NM_004364.3: c.247del (p.Gln83Serfs*77) <sup>‡</sup> , c.937_939dup (p.Lys313dup) <sup>‡</sup>                                                                                                               |
| Patient 17 | <i>CEBPA</i> NM_004364.3: c.262C>T (p.Gln88*) <sup>‡</sup> , c.949_950insACC (p.Glu316_Leu317insHis) <sup>‡</sup>                                                                                                         |
| Patient 18 | <i>CEBPA</i> NM_004364.3: c.273dup (p.Lys92Glnfs*16) <sup>‡</sup> , c.926_927insTCA (p.Glu309delinsAspGln) <sup>‡</sup>                                                                                                   |
| Patient 19 | <i>CEBPA</i> NM_004364.3: c.296del (p.Gly99Alafs*61) <sup>‡</sup> , c.921_938del (p.Asn307_Gln312del) <sup>‡</sup> // <i>GATA2</i> NM_032638.4: c.952G>A (p.Ala318Thr) (VAF 43%)                                          |
| Patient 20 | <i>CEBPA</i> NM_004364.3: c.46dup (p.Ser16Lysfs*92) <sup>‡</sup> , c.899_931dup (p.Arg300_Thr310dup) <sup>‡</sup> // <i>GATA2</i> NM_032638.4: c.972G>C (p.Lys324Asn) (VAF 44%)                                           |
| Patient 21 | <i>CEBPA</i> NM_004364.3: c.56dup (p.Gln20Alafs*88) <sup>‡</sup> , c.909_910insTTC (p.Ala303_Lys304insPhe) <sup>‡</sup> // <i>GATA2</i> NM_032638.4: c.1010G>T (p.Arg337Leu) (VAF 36%), c.1013G>A (p.Arg338Lys) (VAF 36%) |
| Patient 22 | <i>ETV6</i> NM_001987.4: deletion (128kb, CN=1.0, mean log2 ratio: -0.43)                                                                                                                                                 |
| Patient 23 | <i>ETV6</i> NM_001987.4: deletion (543kb, CN=1.0, mean log2 ratio: -0.44)                                                                                                                                                 |
| Patient 24 | <i>ETV6</i> NM_001987.4: c.1127T>A (p.Leu376Gln) (VAF 39%)                                                                                                                                                                |
| Patient 25 | <i>ETV6</i> NM_001987.4: c.1170del (p.Tyr391Metfs*14) (VAF 37%)                                                                                                                                                           |
| Patient 26 | <i>ETV6</i> NM_001987.4: c.1252A>G (p.Arg418Gly) (VAF 45%)                                                                                                                                                                |
| Patient 27 | <i>GATA2</i> NM_032638.4: c.95_98dup (p.Tyr33*) (VAF 37%)                                                                                                                                                                 |

|            |                                                                                                                                      |
|------------|--------------------------------------------------------------------------------------------------------------------------------------|
| Patient 28 | <i>GATA2</i> NM_032638.4: c.1009C>T (p.Arg337*) (VAF 40%) // <i>RUNX1</i> NM_001754.4: c.1017_1022dup (p.Ile339_Gly340dup) (VAF 38%) |
| Patient 29 | <i>GATA2</i> NM_032638.4: c.1083_1085dup (p.Arg362dup) (VAF 35%)                                                                     |
| Patient 30 | <i>GATA2</i> NM_032638.4: c.1083_1085dup (p.Arg362dup) (VAF 42%)                                                                     |
| Patient 31 | <i>GATA2</i> NM_032638.4: c.1114G>A (p.Ala372Thr) (VAF 47%)                                                                          |
| Patient 32 | <i>GATA2</i> NM_032638.4: c.1187G>A (p.Arg396Gln) (VAF 50%)                                                                          |
| Patient 33 | <i>RUNX1</i> NM_001754.4: deletion (115kb, CN:1.0, mean log2 ratio: -0.42)                                                           |
| Patient 34 | <i>RUNX1</i> NM_001754.4: deletion (160kb, CN=1.0, mean log2 ratio: -0.56)                                                           |
| Patient 35 | <i>RUNX1</i> NM_001754.4: deletion (332kb, CN=1.0, mean log2 ratio: -0.37)                                                           |
| Patient 36 | <i>RUNX1</i> NM_001754.4: deletion (50kb, CN=1.0, mean log2 ratio: -0.48)                                                            |
| Patient 37 | <i>RUNX1</i> NM_001754.4: c.279_280dup (p.Ser94Thrfs*29) (VAF 40%)                                                                   |
| Patient 38 | <i>RUNX1</i> NM_001754.4: c.283C>T (p.Pro95Ser) (VAF 34%)                                                                            |
| Patient 39 | <i>RUNX1</i> NM_001754.4: c.422C>A (p.Ser141*) (VAF 33%), c.493G>A (p.Gly165Ser) (VAF 33%)                                           |
| Patient 40 | <i>RUNX1</i> NM_001754.4: c.427_428insGGCTCGGCTG (p.Glu143Glyfs*4) (VAF 36%)                                                         |
| Patient 41 | <i>RUNX1</i> NM_001754.4: c.453G>T (p.Met151Ile) (VAF 44%), c.697C>T (p.Arg233Cys) (VAF 46%)                                         |
| Patient 42 | <i>RUNX1</i> NM_001754.4: c.456_458dup (p.Lys152dup) (VAF 38%)                                                                       |
| Patient 43 | <i>RUNX1</i> NM_001754.4: c.492_493insCCTAACCA (p.Gly165Profs*14) (VAF 33%)                                                          |
| Patient 44 | <i>RUNX1</i> NM_001754.4: c.602G>A (p.Arg201Gln) (VAF 42%)                                                                           |
| Patient 45 | <i>RUNX1</i> NM_001754.4: c.602G>A (p.Arg201Gln) (VAF 43%)                                                                           |
| Patient 46 | <i>RUNX1</i> NM_001754.4: c.610C>T (p.Arg204*) (VAF 42%), c.619C>T (p.Arg207Trp) (VAF 45%)                                           |
| Patient 47 | <i>RUNX1</i> NM_001754.4: c.665_666dup (p.Glu223Profs*15) (VAF 38%), c.1352_1353insGATAATTAGTA (p.Asp451fs) (VAF 43%)                |
| Patient 48 | <i>RUNX1</i> NM_001754.4: c.908C>G (p.Ser303*) (VAF 37%)                                                                             |
| Patient 49 | <i>RUNX1</i> NM_001754.4: c.1170_1180del (p.Ala391Profs*205) (VAF 38%)                                                               |
| Patient 50 | <i>RUNX1</i> NM_001754.4: c.1184C>G (p.Pro395Arg) (VAF 56%)                                                                          |
| Patient 51 | <i>TP53</i> NM_001126112.2: c.637C>T (p.Arg213*) (VAF 85%)                                                                           |
| Patient 52 | <i>TP53</i> NM_001126112.2: c.917G>A (p.Arg306Gln) (VAF 48%)                                                                         |

### Supplementary Table 2 legend

‡: variant identified by Sanger sequencing.

CN: Copy number state

**Supplementary Table 3: Identified variants at diagnosis and at time of complete remission**

| Patient   | Gene mutation                                                               | Variant status at diagnosis                       | Variant status at time of complete remission      |
|-----------|-----------------------------------------------------------------------------|---------------------------------------------------|---------------------------------------------------|
| Patient 1 | <i>CEBPA</i> NM_004364.3:c.65_125del (p.Pro22Leufs*118)                     | Present (Sanger sequencing)                       | Present (Sanger sequencing)                       |
|           | <i>CEBPA</i> NM_004364.3:c.934_936dup (p.Gln312dup)                         | Present, VAF: 41%                                 | Not found                                         |
|           | <i>WT1</i> NM_024426.3:c.1357_1361delinsAGTAG (p.Cys453_Lys454delinsSerArg) | Present, VAF: 26%                                 | Not found                                         |
| Patient 2 | <i>GATA2</i> NM_032638.4:c.1114G>A (p.Ala372Thr)                            | Present, VAF: 50%                                 | Present, VAF: 49%                                 |
| Patient 3 | <i>GATA2</i> NM_032638.4:c.1008del (p.Lys336Asnfs*51)                       | Present, VAF: 48%                                 | Present, VAF: 53%                                 |
|           | <i>JAK2</i> NM_004972.3:c.1849G>T (p.Val617Phe)                             | Present, VAF: 44%                                 | Not found                                         |
|           | <i>SETBP1</i> NM_015559.2:c.2602G>T (p.Asp868Tyr)                           | Present, VAF: 42%                                 | Not found                                         |
| Patient 4 | <i>RUNX1</i> NM_001754.4:c.601C>T (p.Arg201*)                               | Present, VAF: 48%                                 | Present, VAF: 49%                                 |
|           | <i>KRAS</i> NM_NM_033360.2:c.38G>A (p.Gly13Asp)                             | Present, VAF: 19%                                 | Not found                                         |
| Patient 5 | <i>RUNX1</i> NM_001754.4 deletion                                           | Present, CN:1, mean log2 ratio: -0.54 (SNP-array) | Present, CN:1, mean log2 ratio: -0.61 (SNP-array) |

**Supplementary Table 4: Rules applied to classify the variants as per American College of Medical Genetics and Genomics and Association for Molecular Pathology (ACMG-AMP) guidelines<sup>2</sup>**

| Patient          | ACMG-AMP clinical significance | Rules applied                                                 | Comments                                                                                                                                                                                                                                                                                                                                                                                                                                                                                                                                                                                                                                                                                                                                      |
|------------------|--------------------------------|---------------------------------------------------------------|-----------------------------------------------------------------------------------------------------------------------------------------------------------------------------------------------------------------------------------------------------------------------------------------------------------------------------------------------------------------------------------------------------------------------------------------------------------------------------------------------------------------------------------------------------------------------------------------------------------------------------------------------------------------------------------------------------------------------------------------------|
| <b>Patient 1</b> | Pathogenic                     | PVS1, PM1, PM2                                                | <b>PVS1:</b> Frameshift variant in the N-terminal region resulting in the loss of <i>CEBPA</i> function <sup>3</sup><br><b>PM1:</b> Mutation located in the N-terminal region, a critical region of well-established germline mutations <sup>4</sup><br><b>PM2:</b> Absent from controls in the Genome Aggregation Database                                                                                                                                                                                                                                                                                                                                                                                                                   |
| <b>Patient 2</b> | Likely pathogenic              | PM1, PM2, PM6, PP3, PP4, PP5                                  | <b>PM1:</b> Mutation located in the zinc finger 2 domain<br><b>PM2:</b> Absent from controls in the Genome Aggregation Database<br><b>PM6:</b> The variant is assumed de novo (parentage not confirmed)<br><b>PP3:</b> Mutation predicted deleterious according to the following computational tools: MAPP (77%), PhD-SNP (88%), PolyPhen-1 (74%), PolyPhen-2 (81%), SIFT (79%) and SNAP (81%) <sup>5</sup><br><b>PP4:</b> The patient displayed features compatible with <i>GATA2</i> -related phenotype: monosomy 7, AML, monocytopenia, B-cell and NK cell deficiencies, and viral infections (labial HSV and H1N1 influenza)<br><b>PP5:</b> The same variant has previously been described as pathogenic in other patients <sup>6,7</sup> |
| <b>Patient 3</b> | Pathogenic                     | PVS1, PM2, PM6                                                | <b>PVS1:</b> Frameshift mutation located between the two zinc finger domains, resulting in the loss of the second zinc finger domain, which is a known mechanism of <i>GATA2</i> disorders <sup>8,9</sup><br><b>PM2:</b> Absent from controls in the Genome Aggregation Database<br><b>PM6:</b> The variant is assumed de novo (parentage not confirmed)                                                                                                                                                                                                                                                                                                                                                                                      |
| <b>Patient 4</b> | Pathogenic                     | PVS1, PS1_strong, PS4_supporting <sup>10</sup>                | <b>PVS1:</b> Nonsense variant located in the Runt Homology Domain, resulting in the loss of DNA-binding activity which is a known mechanism of familial platelet disorder with predisposition to myeloid malignancy <sup>11,12</sup><br><b>PS1_strong:</b> This amino acid change has been previously reviewed and established as pathogenic by the ClinGen Myeloid Malignancy Variant Curation Expert Panel<br><b>PS4_supporting:</b> The patient displays AML, which is part of the <i>RUNX1</i> -related phenotype                                                                                                                                                                                                                         |
| <b>Patient 5</b> | Pathogenic                     | As per <i>RUNX1</i> PVS1 decision tree for CNVs <sup>10</sup> | Full gene deletion                                                                                                                                                                                                                                                                                                                                                                                                                                                                                                                                                                                                                                                                                                                            |

Supplementary Figure 1: *RUNX1* deletion in patient 5 at diagnosis and at time of complete remission

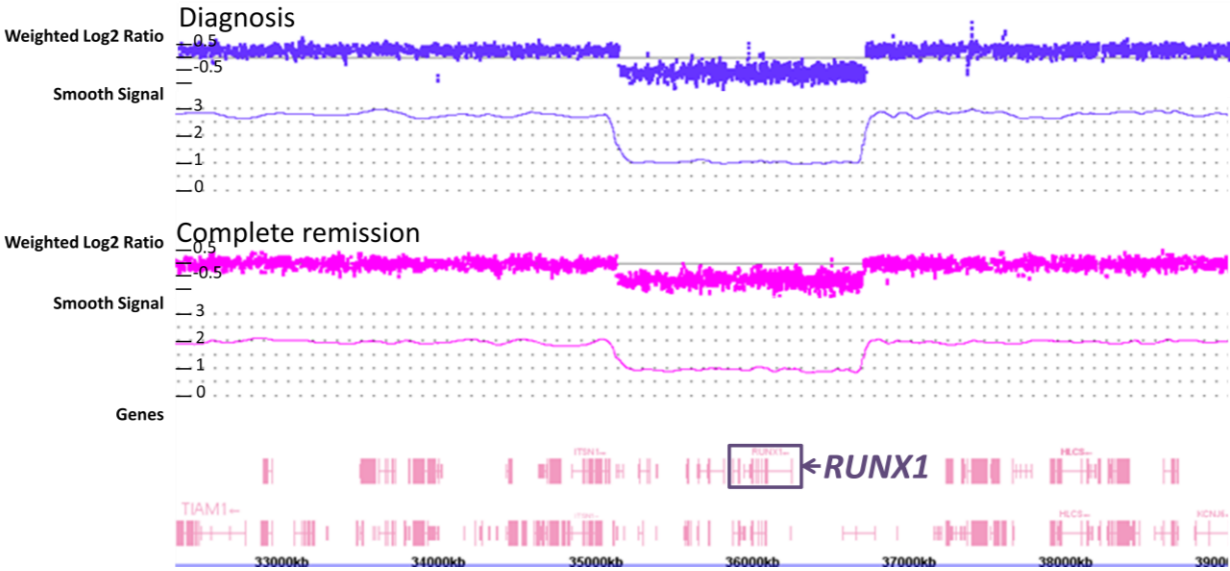

**Supplementary Figure 2: Family pedigrees of patients (1 to 5) with germline pathogenic/likely pathogenic variants (represented in A to E, respectively)**

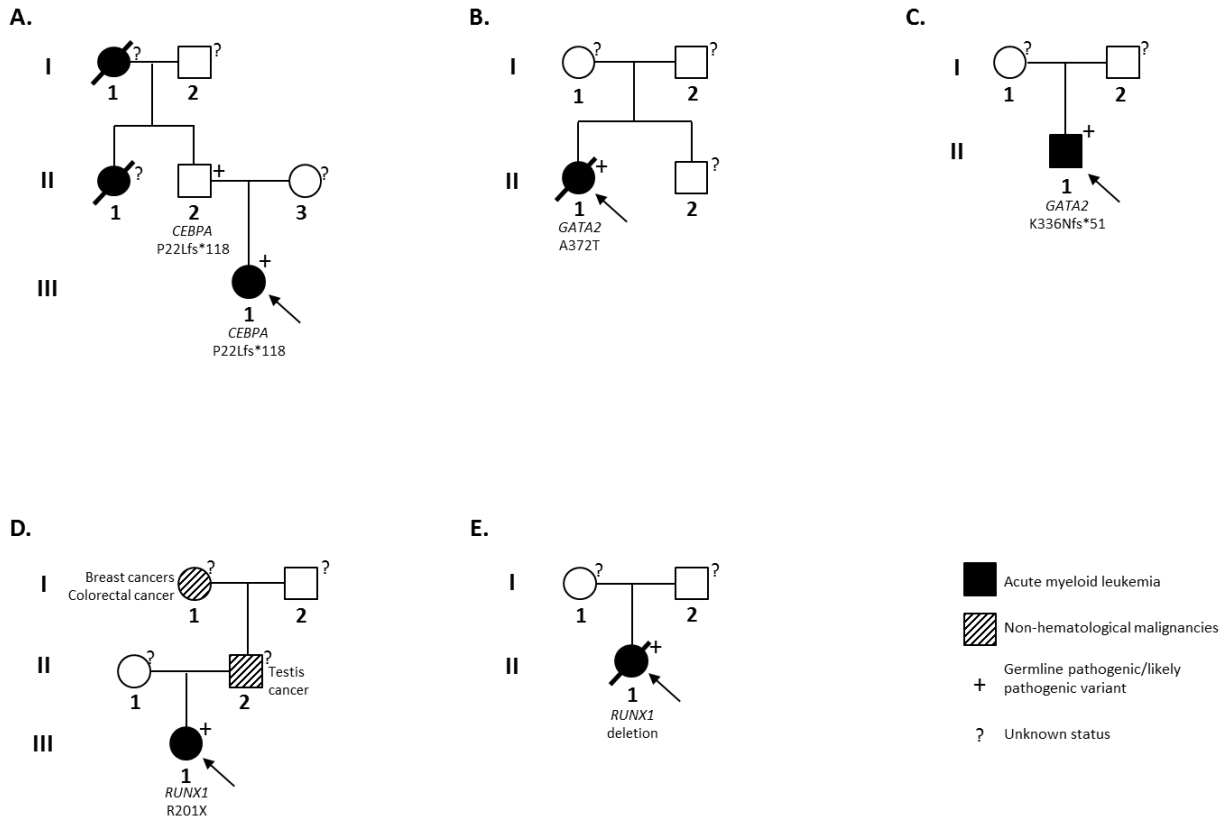



## References

1. Marceau-Renaut A, Duployez N, Ducourneau B, et al. Molecular Profiling Defines Distinct Prognostic Subgroups in Childhood AML: A Report From the French ELAM02 Study Group. *HemaSphere* 2018;2(1):e31.
2. Richards S, Aziz N, Bale S, et al. Standards and guidelines for the interpretation of sequence variants: a joint consensus recommendation of the American College of Medical Genetics and Genomics and the Association for Molecular Pathology. *Genet Med Off J Am Coll Med Genet* 2015;17(5):405–424.
3. Pabst T, Mueller BU. Transcriptional dysregulation during myeloid transformation in AML. *Oncogene* 2007;26(47):6829–6837.
4. Tawana K, Wang J, Renneville A, et al. Disease evolution and outcomes in familial AML with germline CEBPA mutations. *Blood* 2015;126(10):1214–1223.
5. Bendl J, Stourac J, Salanda O, et al. PredictSNP: robust and accurate consensus classifier for prediction of disease-related mutations. *PLoS Comput Biol* 2014;10(1):e1003440.
6. Donadieu J, Lamant M, Fieschi C, et al. Natural history of GATA2 deficiency in a survey of 79 French and Belgian patients. *Haematologica* 2018;103(8):1278–1287.
7. Ganapathi KA, Townsley DM, Hsu AP, et al. GATA2 deficiency-associated bone marrow disorder differs from idiopathic aplastic anemia. *Blood* 2015;125(1):56–70.
8. Pasquet M, Bellanné-Chantelot C, Tavitian S, et al. High frequency of GATA2 mutations in patients with mild chronic neutropenia evolving to MonoMac syndrome, myelodysplasia, and acute myeloid leukemia. *Blood* 2013;121(5):822–829.
9. Wlodarski MW, Collin M, Horwitz MS. GATA2 deficiency and related myeloid neoplasms. *Semin Hematol* 2017;54(2):81–86.
10. Luo X, Feurstein S, Mohan S, et al. ClinGen Myeloid Malignancy Variant Curation Expert Panel recommendations for germline RUNX1 variants. *Blood Adv* 2019;3(20):2962–2979.
11. Sood R, Kamikubo Y, Liu P. Role of RUNX1 in hematological malignancies. *Blood* 2017;129(15):2070–2082.
12. Okada Y, Watanabe M, Nakai T, et al. RUNX1, but not its familial platelet disorder mutants, synergistically activates PF4 gene expression in combination with ETS family proteins. *J Thromb Haemost* 2013;11(9):1742–1750.
